# Supplementary material
Source: PubMed Central journal article supplement (PMC6849943)
Supplement: baADV2019000250-suppl1.pdf [file baADV2019000250-suppl1.pdf]

## Supplemental Figure 1

**A**

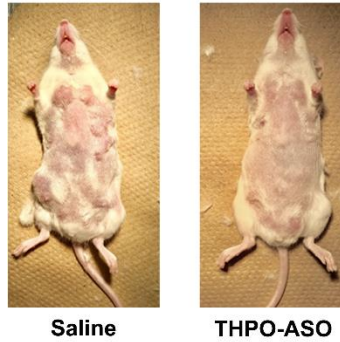

**B**

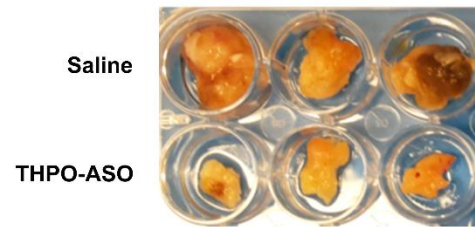

**Supplemental Figure 1.** THPO-ASO treatment suppresses mammary tumor growth in MMTV-PyMT mice.

Representative macroscopic images of MMTV-PyMT mice (A) and their individual tumors (B) at 80 days of age.

## Supplemental Figure 2

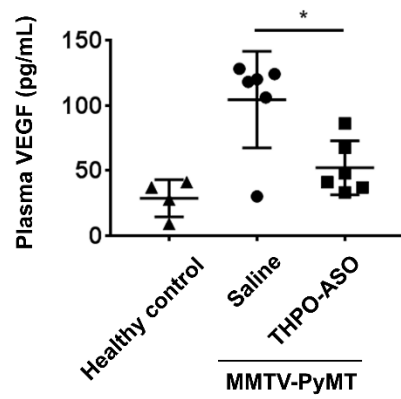

**Supplemental Figure 2.** Circulating VEGF levels in MMTV-PyMT mice.

Plasma was isolated from each mouse at the time of euthanasia and plasma VEGF levels were measured using an ELISA. A decrease in circulating VEGF levels was observed in THPO-ASO-treated animals. A two-tailed, unpaired Student's t-test was used for comparison of means; \* $p < 0.05$ .

### Supplemental Figure 3

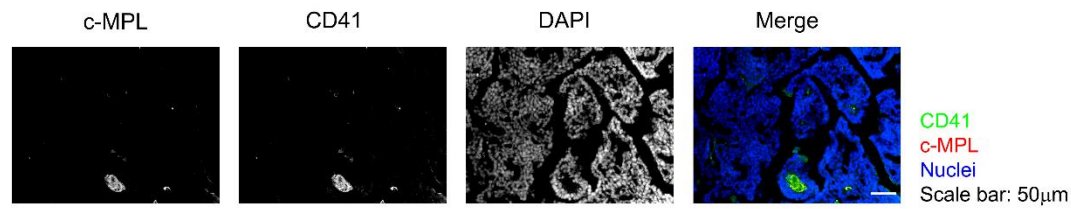

**Supplemental Figure 3.** Lack of c-MPL expression in the mammary tumors of MMTV-PyMT mice.

Representative image from histopathology for c-MPL expression in mammary tumors. Platelets and c-MPL were visualized with anti-CD41 (green) and anti-MPL (red) antibodies. Nuclei were visualized with Hoechst 33342 (blue). Only platelets located inside the blood vessels showed positive immunofluorescence for c-MPL and CD41. Scale bar = 50µm.
